# Supplementary material for: Epithelial Yap/Taz are required for functional alveolar regeneration following acute lung injury
Source: PubMed Central journal article supplement (PMC10629815; doi:10.1172/jci.insight.173374), 2023-09-07
Supplement: jciinsight-8-173374-s055.pdf [file jciinsight-8-173374-s055.pdf]

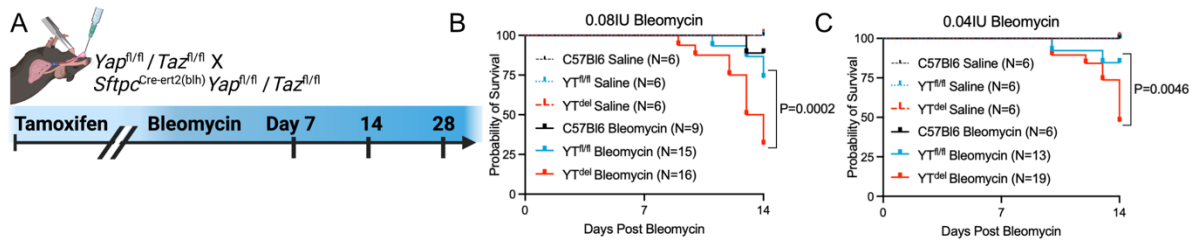

**Supplemental Figure S1:** **A)** Schematic of bleomycin lung injury, in which mice are treated with tamoxifen 2-weeks prior to injury with a planned 28-day recovery. **B,C)** Survival curves of mice treated with 0.08IU bleomycin (**B**) or 0.04IU bleomycin (**C**). Mantel-Cox test was used to determine statistical significance.

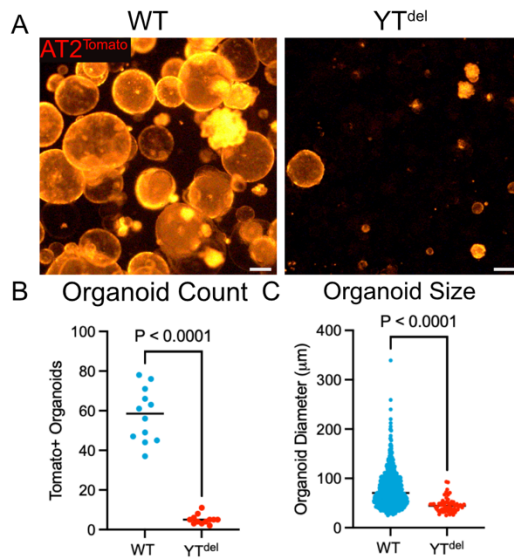

**Supplemental Figure S2:**  $Y_T^{del}$  generate fewer and smaller organoids in feeder-free culture. **A.)** Fluorescent image of Tomato lineage labeled  $AT2$  cells cultured in SFFFM media for 14-days. **B.)** Quantification of total number of organoids per well and **C.)** organoid size analysis of organoids larger than  $25\mu m$ . Statistical analysis performed with an unpaired t-test. Scale bar represents  $25\mu m$ . Organoids were grown from 3 mice per group, 4 wells per mouse.

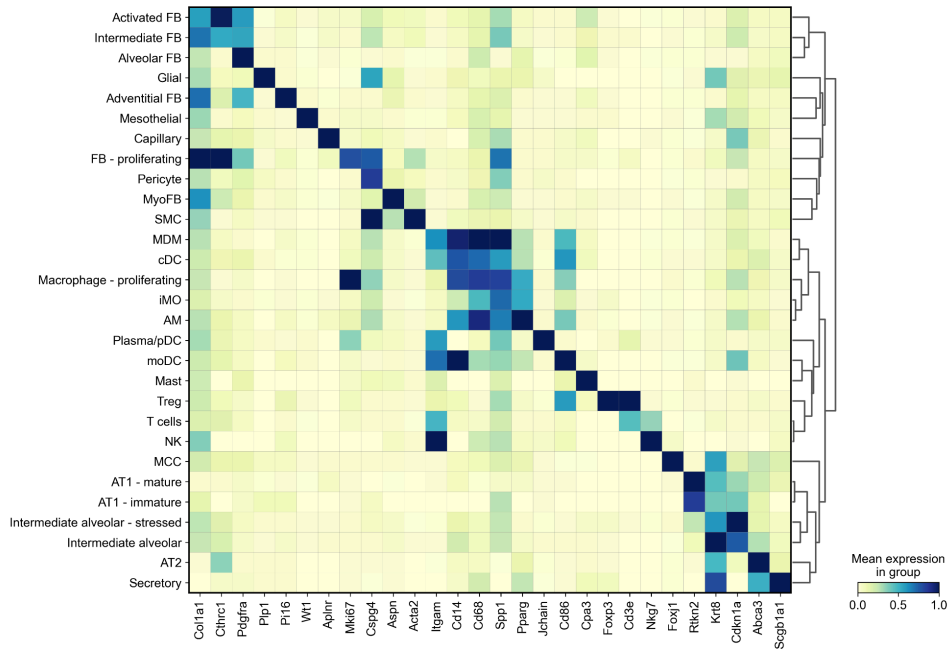

**Supplemental Figure S3:** Cell types identified in single-cell RNA sequencing analysis and expression of cell-type specific markers.

### Flow gating strategy

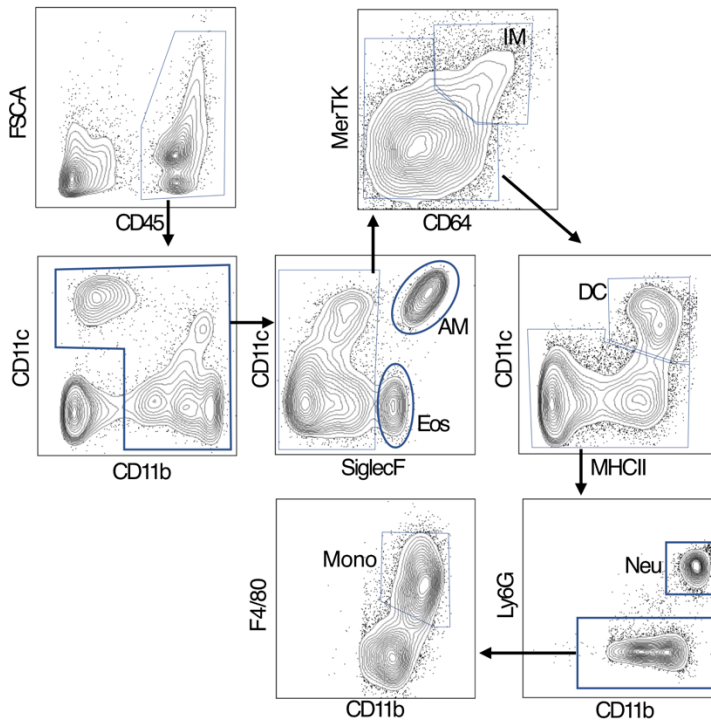

**Supplemental Figure S4:** Flow Cytometry gating strategy of immune cells isolated from mouse lung single-cell suspensions.

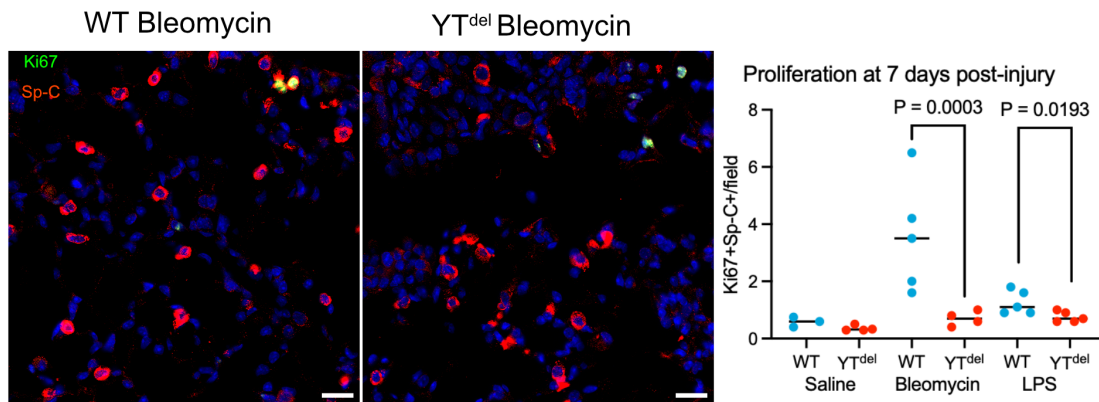

**Supplemental Figure S5: Analysis of proliferating AT2 cells following injury.**

Immunofluorescence analysis of proliferating Ki67+ (green) Sp-C+ AT2 (red) cells at 7 days post bleomycin or LPS injury. N=3 WT saline, N=4 YT<sup>del</sup> saline and bleomycin, N=5 WT bleomycin, WT LPS and YT<sup>del</sup> LPS treated mice. Statistical significance determined by one-way ANOVA and Tukey's post-hoc comparison.

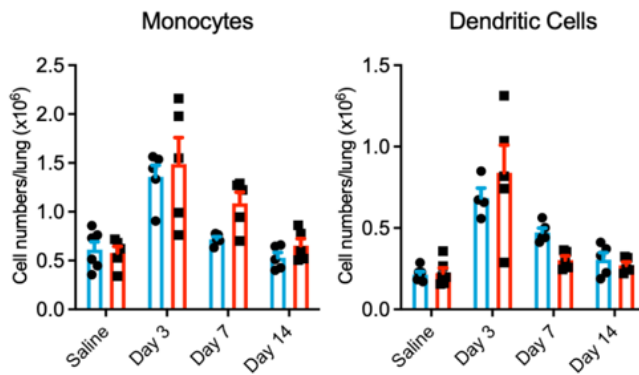

**Supplemental Figure S6:** Flow cytometry of total numbers of monocytes and dendritic cells isolated from LPS injured lungs at day 3, 7, and 14 after injury. Cell numbers were not significantly different based on genotype determined by one-way ANOVA and Tukey's post-hoc comparison. N=6 saline and N=5 LPS mice per group.

| Antibody | Company                   | Host Species | Catalog #       | Concentration  |
|----------|---------------------------|--------------|-----------------|----------------|
| SPC      | Seven Hills Bioreagents   | Rabbit       | WRAB-9337       | 1:400          |
|          | Abcam                     | Rabbit       | AB90716         | 1:100          |
| YAP      | Seven Hills Bioreagents   | Rabbit       | WRAB-1549       | 1:100          |
|          | Cell Signaling Technology | Rabbit       | 4912S<br>14074S | 1:100<br>1:100 |
| TAZ      | Cell Signaling Technology | Rabbit       | 83669S          | 1:100          |
| HOPX     | Santa Cruz Biotechnology  | AF647 Conj.  | sc-398703       | 1:100          |
| Ki67     | Cell Signaling Technology | AF647 Conj.  | 12075S          | 1:100          |
| TdTomato | SICGEN                    | Goat         | AB8181-200      | 1:500          |

**Supplemental Table S1:** Antibodies used for immunofluorescence analysis with respective catalog information and concentration used.
